# Supplementary material for: A new record of Avrainvillea cf. erecta (Berkeley) A. Gepp & E. S. Gepp (Bryopsidales, Chlorophyta) from urbanized estuaries in the Hawaiian Islands
Source: Biodivers Data J. 2018 Oct 5;(6):e21617. doi: 10.3897/BDJ.6.e21617 (PMC6185993; doi:10.3897/BDJ.6.e21617)
Supplement: Supplementary material 2 — Specimen and sequence information for those used in both morphological and molecular assessment. [file bdj-06-e21617-s002.xlsx]

## Sheet: Table_S1.txt
		Field/Herbarium Code								GenBank Accessions
	ARS #	BISH #	BM#	TS #	GWS #	Collection Location	Collection Date	Collector	Determiner	rbcL	tufA
Avrainvillea sp.	8291					Mediterranean Sea, Libya	2012-04-07	A. El Fituri	R. Wade	MF872090	MF872115
Avrainvillea sp.	8292					Mediterranean Sea, Libya	2012-04-07	A. El Fituri	R. Wade	MF872091	MF872116
"Avrainvillea amadelpha"	8383					Natatorium Reef, Waikiki, O‘ahu	2012-12-21	G. Kraft	R. Wade	MF872087	MF872112
"Avrainvillea amadelpha"	8418					Hunakai Beach; east of pipe, <1 m	2013-03-23	R. Wade	R. Wade	MF872096	MF872124
Avrainvillea sp.	8484					Great Chagos Bank, Indian Ocean; 15m, Fringing Reef, 6°10.346' S, 71°19.988 E	2013-03-07	D. Wagner	R. Wade	MF872092	MF872117
Avrainvillea erecta	8485					Bunaken Island, Sulawesi; Intertidal, Sand Flats	2012-03-01	H. Spalding	R. Wade	MF872094	MF872119
"Avrainvillea amadelpha"	8510					Barber's Pt., Oahu; 120 feet (36 m), thin layer of sediment on flat carbonate.	2013-07-23	M. Ross	R. Wade	MF872089	MF872114
"Avrainvillea amadelpha"	8511					Barber's Pt., Oahu; 120 feet (36 m), thin layer of sediment on flat carbonate.	2013-07-23	M. Ross	R. Wade	MF872093	MF872118
Avrainvillea erecta	8603					Eor, Murilo Atoll, Federated States of Micronesia, Chuuk State; LAT 8.685683333, LON 152.334283	2008-08-02		R. Wade	MF872076	MF872101
Avrainvillea riukiuensis	8608					Moch Island, Satawan Atoll, Federated States of Micronesia, Chuuk State; LAT 5.479666667, LON 153.539667	2008-04-17		R. Wade	MF872078	MF872103
Avrainvillea erecta	8609					Satawan Atoll, Federated States of Micronesia, Chuuk State; LAT 5.374, LON 153.5561	2008-08-16		R. Wade	MF872088	MF872113
Avrainvillea erecta	9414	768278				Ke‘ehi Lagoon, O‘ahu; 25-40 m	2017-04-22	M. Ross	R. Wade	MF872083	MF872108
Avrainvillea erecta	9417	768279				Ke‘ehi Lagoon, O‘ahu; 25-40 m	2017-04-22	M. Ross	R. Wade	MF872080	MF872105
Avrainvillea erecta	9418	268280				Ke‘ehi Lagoon, O‘ahu; 25-40 m	2017-04-22	M. Ross	R. Wade	MF872081	MF872106
Avrainvillea erecta	9429	768281				Ke‘ehi Lagoon, O‘ahu; 25-40 m	2017-04-22	M. Ross	R. Wade	MF872084	MF872109
Avrainvillea erecta	9431	768282				Ke‘ehi Lagoon, O‘ahu; 25-40 m	2017-04-22	M. Ross	R. Wade	MF872082	MF872107
Avrainvillea erecta	9432	768283				Ke‘ehi Lagoon, O‘ahu; 25-40 m	2017-04-22	M. Ross	R. Wade	MF872085	MF872110
Avrainvillea erecta	9436	768338				Entrance channel to Honolulu Harbor, Honolulu, O‘ahu	2014-10-15	K. Peyton	R. Wade	MF969093	MF969095
Avrainvillea erecta	9437	768339				Entrance channel to Honolulu Harbor, Honolulu, O‘ahu	2014-10-15	K. Peyton	R. Wade	MF969094	MF969096
Cladocephalus sp.	8897			1796		Mote Marine Laboratory Lagoon/Summerland Key, Fronting Lagoon, <2 m	11-13-Sept-13	T. Sauvage	R. Wade	MF872072	MF872097
Cladocephalus sp.	8899			1820		Venture Key, across Mote Lab, <2 m	2013-09-12	T. Sauvage	R. Wade	MF872073	MF872098
Avrainvillea sp.	8894			1356		Haemida: Iriomote SIte 3, 1-2 m	2012-07-24	T. Sauvage	R. Wade	MF872074	MF872099
Avrainvillea sp.	8895			1543		Sesoko Island, Okinawa summer site 4, 1-2 m	2012-08-04	T. Sauvage	R. Wade	MF872075	MF872100
Avrainvillea erecta	8886			1256		Hamahiga resort beach: Okinawa site 2 Summer	2012-06-24	T. Sauvage	R. Wade	MF872077	MF872102
Avrainvillea sp.	8885			787		Site 15 Suez artificial rocky pier, 1 m	2011-07-11	T. Sauvage	R. Wade	MF872079	MF872104
Avrainvillea sp.	8884			786		Site 15 Suez artificial rocky pier, 1 m	11-Jul-2011	T. Sauvage	R. Wade	MF872086	MF872111
Avrainvillea sp.	8891			1331		Sonai, Iriomote Site 1, Okinawa	2012-07-24	T. Sauvage	R. Wade	MF872095	MF872123
Avrainvillea calathina					22850	Malabar Reef, Lord Howe, AU	2010-11-21		R. Wade		MF872120
Avrainvillea calathina					22886	Malabar Reef, Lord Howe, AU	2010-11-21		R. Wade		MF872121
Avrainvillea calathina					23474	Algae Hole North, Lord Howe, AU	2010-11-21		R. Wade		MF872122
"Chloroplegma papuanum" - A. erecta heterotypic synonym			561613			Papua, Indonesia	May-1872	O. Beccari	Zanardini	MH938452
